# Supplementary material for: Molecular profiling of cetuximab and bevacizumab treatment of colorectal tumours reveals perturbations in metabolic and hypoxic response pathways
Source: PubMed Central journal article supplement (PMC4741991; doi:10.18632/oncotarget.6241), 2015-10-26
Supplement: oncotarget-06-38166-s001.pdf [file oncotarget-06-38166-s001.pdf]

# Molecular profiling of cetuximab and bevacizumab treatment of colorectal tumours reveals perturbations in metabolic and hypoxic response pathways

## Supplementary Material

A

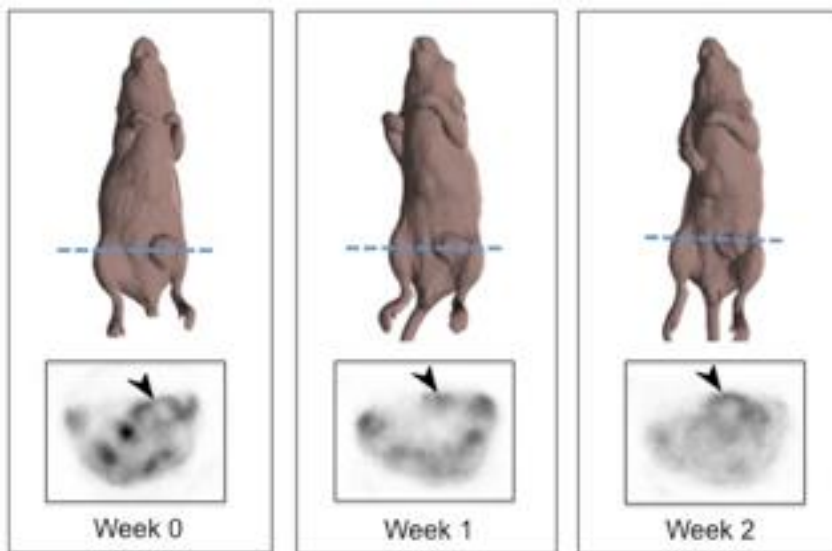

B

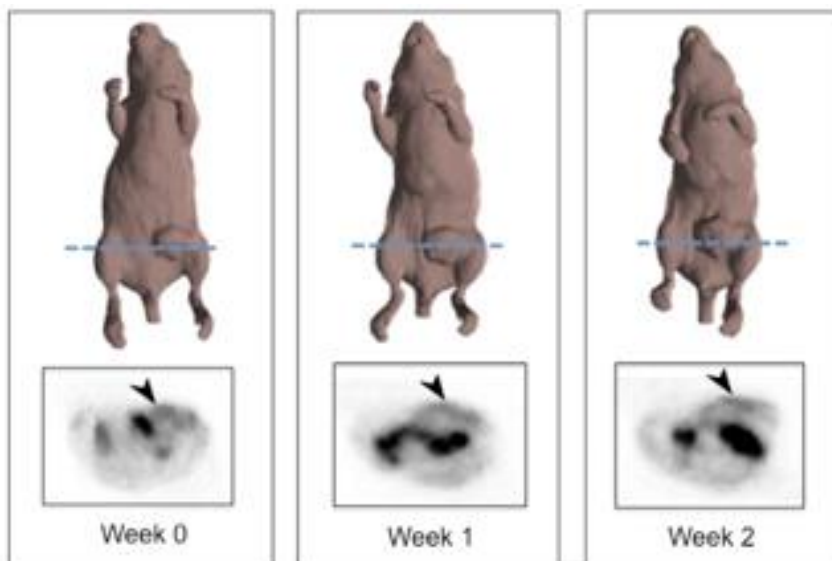

**Supplementary Figure 1. Molecular imaging of metabolism and hypoxia in colorectal tumours after cetuximab treatment.**

Whole body surface rendered MRI scans (top), and transaxial PET images (bottom) through tumour, are shown at baseline and following Cetuximab treatment. (A)  $^{18}\text{F}$ -FDG PET and MRI images, and (B)  $^{18}\text{F}$ -FMISO PET and MRI images. Arrows indicate site of tumour on transaxial PET images. Normal uptake of  $^{18}\text{F}$ -FDG in muscle and bowel (A), and  $^{18}\text{F}$ -FMISO excretion in bowel (B), is evident.

**See Supplementary Table: Proteins identified in HT-29 and LIM1215 tumour lysates in response to therapeutic treatment**

Spectral counts, and ratios (fold-change) of proteins in replicates of control (PBS), bevacizumab, cetuximab, and combination treatments of HT-29 and LIM1215 tumour lysates.
